# Supplementary material for: NIR/blue light emission optimization of NaY1−(x+y)YbxF4:Tmy upconversion nanoparticles via Yb3+/Tm3+ dopant balancing
Source: Royal Society of Chemistry journal article supplement (doi:10.1039/c7dt04768a), 2018-01-01
Supplement: c7dt04768a1.pdf [file c7dt04768a1.pdf]

## Supporting Information

# NIR/Blue light emission optimization of $\text{NaY}_{1-x-y}\text{F}_4:\text{Yb}_x\text{Tm}_y$ upconversion nanoparticles via $\text{Yb}^{3+}/\text{Tm}^{3+}$ dopant balancing

Ali Bagheri<sup>a,b\*</sup>, Zheyue Li<sup>a</sup>, Cyrille Boyer<sup>b</sup> and May Lim<sup>a</sup>

<sup>a</sup>*School of Chemical Engineering, The University of New South Wales, Sydney NSW 2052, Australia*

<sup>b</sup>*Centre for Advanced Macromolecular Design (CAMD) and Australian Centre for NanoMedicine (ACN), School of Chemical Engineering, The University of New South Wales, Sydney NSW 2052, Australia*

**KEYWORDS:** *upconversion nanoparticle, lanthanide, optimization, dopant balancing*

### Corresponding Author

\*E-mails: a.bagheri@unsw.edu.au

## **Experimental Section**

### **Materials**

Rare-earth chlorides ( $\text{LnCl}_3 \cdot 6\text{H}_2\text{O}$ , where  $\text{Ln} = \text{Y, Yb, Tm}$ ; 99.9% trace metals basis), oleic acid (OA), 1-octadecene, sodium hydroxide (NaOH) and ammonium fluoride ( $\text{NH}_4\text{F}$ ), were all purchased from Sigma-Aldrich and used as received.

**Table S1:** Elemental composition of  $\text{NaY}_{1-(x+y)}\text{Yb}_x\text{F}_4:\text{Tm}_y$  doped with Yb and Tm obtained from ICP-MS analysis

| Sample      | Designed Compositions (mole fraction) |                  |                  | Measured Compositions (mole fraction) |                  |                  |
|-------------|---------------------------------------|------------------|------------------|---------------------------------------|------------------|------------------|
|             | Y <sup>3+</sup>                       | Yb <sup>3+</sup> | Tm <sup>3+</sup> | Y <sup>3+</sup>                       | Yb <sup>3+</sup> | Tm <sup>3+</sup> |
| <b>UC1</b>  | 0.1317                                | 0.8511           | 0.0172           | 0.1642                                | 0.8193           | 0.0165           |
| <b>UC2</b>  | 0.1451                                | 0.8511           | 0.0038           | 0.1450                                | 0.8503           | 0.0047           |
| <b>UC3</b>  | 0.7539                                | 0.2289           | 0.0172           | 0.7320                                | 0.2509           | 0.0171           |
| <b>UC4</b>  | 0.7673                                | 0.2289           | 0.0038           | 0.7449                                | 0.2516           | 0.0036           |
| <b>UC5</b>  | 0.4590                                | 0.5400           | 0.0010           | 0.3823                                | 0.6167           | 0.0010           |
| <b>UC6</b>  | 0.4400                                | 0.5400           | 0.0200           | 0.4160                                | 0.5664           | 0.0177           |
| <b>UC7</b>  | 0.0095                                | 0.9800           | 0.0105           | 0.0078                                | 0.9827           | 0.0096           |
| <b>UC8</b>  | 0.8895                                | 0.1000           | 0.0105           | 0.8623                                | 0.1269           | 0.0108           |
| <b>UC9</b>  | 0.4495                                | 0.5400           | 0.0105           | 0.3360                                | 0.6553           | 0.0089           |
| <b>UC10</b> | 0.4495                                | 0.5400           | 0.0105           | 0.4436                                | 0.5467           | 0.0096           |
| <b>UC11</b> | 0.4495                                | 0.5400           | 0.0105           | 0.4450                                | 0.5452           | 0.0098           |
| <b>UC12</b> | 0.4495                                | 0.5400           | 0.0105           | 0.4480                                | 0.5426           | 0.0095           |

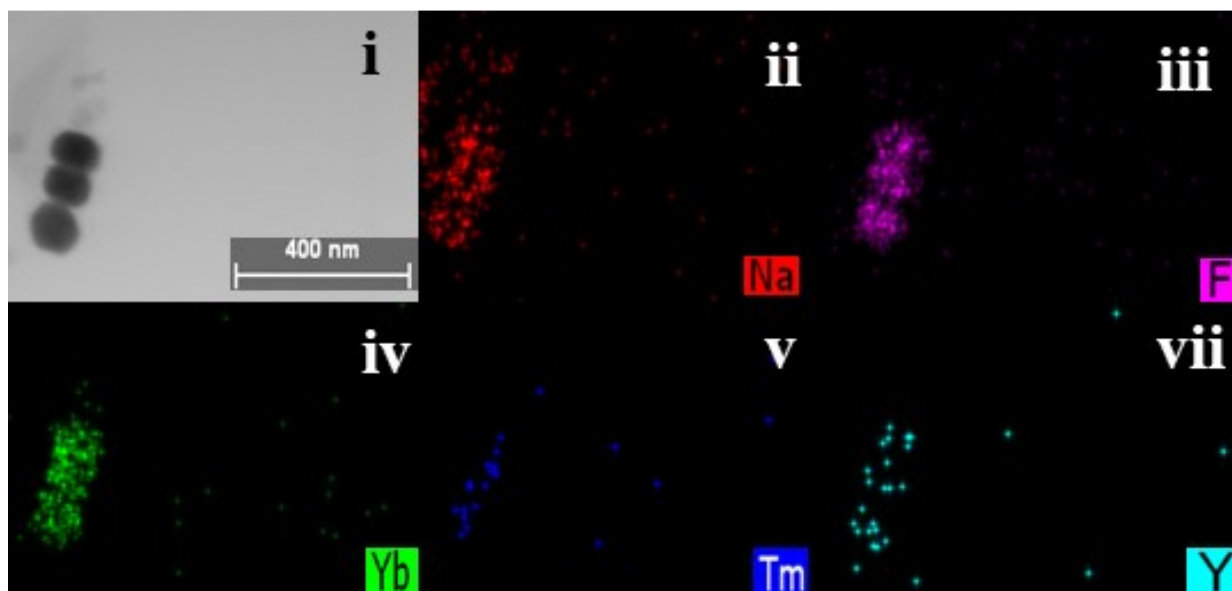

**Figure S1.** (i) TEM image, (ii-vii) EDX elemental mapping images of  $\text{NaY}_{1-(x+y)}\text{Yb}_x\text{F}_4:\text{Tm}_y$  UCNPs where the mole fractions of the  $\text{Yb}^{3+}$  sensitizer and  $\text{Tm}^{3+}$  activator are  $x=0.98$  and  $y=0.0105$ , respectively (sample UC7). Scale bar shows the length of 400 nm.

**Table S2.** Scheme of CCRD with the results of responses on independent factors

| Run/Samples | Compositions of dopant ions<br>(mole fraction) |                  | Responses/observed values (CPS)    |                                   |                                |
|-------------|------------------------------------------------|------------------|------------------------------------|-----------------------------------|--------------------------------|
|             | Yb <sup>3+</sup>                               | Tm <sup>3+</sup> | UCL <sub>475 nm</sub> <sup>a</sup> | UCL <sub>800nm</sub> <sup>b</sup> | Total UC emission <sup>c</sup> |
| UC1         | 0.8511                                         | 0.0172           | 2.051129×10 <sup>5</sup>           | 5.56029040×10 <sup>8</sup>        | 5.62293195×10 <sup>8</sup>     |
| UC2         | 0.8511                                         | 0.0038           | 4.024866×10 <sup>4</sup>           | 4.051487675×10 <sup>7</sup>       | 4.0914163×10 <sup>7</sup>      |
| UC3         | 0.2289                                         | 0.0172           | 2.622874×10 <sup>4</sup>           | 1.314106459×10 <sup>8</sup>       | 1.41754875×10 <sup>8</sup>     |
| UC4         | 0.2289                                         | 0.0038           | 8.804392×10 <sup>4</sup>           | 1.240787462×10 <sup>8</sup>       | 1.35621972×10 <sup>8</sup>     |
| UC5         | 0.5400                                         | 0.0010           | 1.519943×10 <sup>4</sup>           | 1.601579923×10 <sup>7</sup>       | 1.8129107×10 <sup>7</sup>      |
| UC6         | 0.5400                                         | 0.0200           | 1.338236×10 <sup>4</sup>           | 8.364038445×10 <sup>7</sup>       | 8.4703533×10 <sup>7</sup>      |
| UC7         | 0.9800                                         | 0.0105           | 2.203131×10 <sup>5</sup>           | 4.527912046×10 <sup>8</sup>       | 4.57292948×10 <sup>8</sup>     |
| UC8         | 0.1000                                         | 0.0105           | 8.784378×10 <sup>4</sup>           | 1.495043665×10 <sup>8</sup>       | 1.55239543×10 <sup>8</sup>     |
| UC9         | 0.5400                                         | 0.0105           | 1.528179×10 <sup>4</sup>           | 4.155060498×10 <sup>7</sup>       | 4.2355694×10 <sup>7</sup>      |
| UC10        | 0.5400                                         | 0.0105           | 1.252329×10 <sup>4</sup>           | 2.54286443×10 <sup>7</sup>        | 2.5776982×10 <sup>7</sup>      |
| UC11        | 0.5400                                         | 0.0105           | 1.11975×10 <sup>4</sup>            | 2.486714003×10 <sup>7</sup>       | 2.5119235×10 <sup>7</sup>      |
| UC12        | 0.5400                                         | 0.0105           | 1.029185×10 <sup>4</sup>           | 2.452103414×10 <sup>7</sup>       | 2.4795265×10 <sup>7</sup>      |

Integrated emissions were calculated using MATLAB R2017a software as follow: <sup>a</sup> Integrated counts of blue emission (three-photon UC 475 nm) UCL<sub>475 nm</sub> were taken into account between 465 nm and 485 nm; <sup>b</sup> the integrated counts of (two-photon UC 800 nm) UCL<sub>800nm</sub> were taken into account between 750 nm to 850 nm; <sup>c</sup> Total integration of all UCL peaks.

**Table S3.** values of the intercept coefficient ( $\beta_0$ ), linear coefficients ( $\beta_i$ ), squared coefficients ( $\beta_{ii}$ ), and *interaction coefficients* ( $\beta_{ij}$ ) when a second-order polynomial (equ.1) was used to correlate the integrated emission intensities at 800 nm (UCL<sub>800nm</sub>) and 475 nm (UCL<sub>475 nm</sub>) to the Yb<sup>3+</sup> sensitizers (x) and Tm<sup>3+</sup> activators (y) concentrations.

| Emission              | $\beta_0$             | $\beta_x$                 | $\beta_y$              | $\beta_{xx}$           | $\beta_{yy}$             | $\beta_{xy}$             |
|-----------------------|-----------------------|---------------------------|------------------------|------------------------|--------------------------|--------------------------|
| UCL <sub>475 nm</sub> | $3.01069 \times 10^5$ | $-9.63518222 \times 10^3$ | $-1.38960 \times 10^5$ | $7.469878 \times 10^1$ | $5.35101177 \times 10^3$ | $2.71147593 \times 10^3$ |
| UCL <sub>800nm</sub>  | $5.72143 \times 10^8$ | $-1.95124 \times 10^7$    | $-3.05067 \times 10^8$ | $1.50215 \times 10^5$  | $4.37634 \times 10^7$    | $6.07874 \times 10^6$    |

Consequently, two second-order polynomial equations represent UCL<sub>475 nm</sub> and UCL<sub>800nm</sub> respectively as a function of the parameters of formulations:

$$\text{UCL}_{475\text{nm}} = (3.01069 \times 10^5) - ((-9.63518222 \times 10^3) \times \text{Yb}) - ((1.38960 \times 10^5) \times \text{Tm}) + ((7.469878 \times 10^1) \times \text{Yb}^2) + ((5.35101177 \times 10^3) \times \text{Tm}^2) + ((2.71147593 \times 10^3) \times \text{Yb} \times \text{Tm}) \quad (\text{S.1})$$

$$\text{UCL}_{800\text{nm}} = (5.72143 \times 10^8) - ((1.95124 \times 10^7) \times \text{Yb}) - ((3.05067 \times 10^8) \times \text{Tm}) + ((1.50215 \times 10^5) \times \text{Yb}^2) + ((4.37634 \times 10^7) \times \text{Tm}^2) + ((6.07874 \times 10^6) \times \text{Yb} \times \text{Tm}) \quad (\text{S.2})$$

**Table S4.** The ANOVA table for CCRD of UC 800 nm

| Source         | UCL <sub>800 nm</sub> (R <sup>2</sup> =0.9232) |                        |         |         |                    |
|----------------|------------------------------------------------|------------------------|---------|---------|--------------------|
|                | Sum of Squares                                 | Mean Squares           | F-value | P-value |                    |
| Model          | 3.224607874×10 <sup>17</sup>                   | 6.448×10 <sup>16</sup> | 14.43   | 0.0027  | <b>significant</b> |
| A-Yb           | 7.411×10 <sup>16</sup>                         | 7.411×10 <sup>16</sup> | 16.59   | 0.0066  |                    |
| B-Tm           | 4.781×10 <sup>16</sup>                         | 4.781×10 <sup>16</sup> | 10.70   | 0.0170  |                    |
| AB             | 6.456×10 <sup>16</sup>                         | 6.456×10 <sup>16</sup> | 14.45   | 0.0089  |                    |
| A <sup>2</sup> | 1.353×10 <sup>17</sup>                         | 1.353×10 <sup>17</sup> | 30.29   | 0.0015  |                    |
| B <sup>2</sup> | 2.496×10 <sup>15</sup>                         | 2.496×10 <sup>15</sup> | 0.56    | 0.4830  |                    |

**Table S5.** The ANOVA table for CCRD of UC 475 nm.

| Source         | UCL <sub>475 nm</sub> (R <sup>2</sup> =0.9704) |                        |         |          |                    |
|----------------|------------------------------------------------|------------------------|---------|----------|--------------------|
|                | Sum of Squares                                 | Mean Squares           | F-value | P-value  |                    |
| Model          | 6.121×10 <sup>10</sup>                         | 1.224×10 <sup>10</sup> | 39.29   | 0.0002   | <b>significant</b> |
| A-Yb           | 1.267×10 <sup>10</sup>                         | 1.267×10 <sup>10</sup> | 40.67   | 0.0007   |                    |
| B-Tm           | 1.262×10 <sup>9</sup>                          | 1.262×10 <sup>9</sup>  | 4.05    | 0.0908   |                    |
| AB             | 1.285×10 <sup>10</sup>                         | 1.285×10 <sup>10</sup> | 41.22   | 0.0007   |                    |
| A <sup>2</sup> | 3.346×10 <sup>10</sup>                         | 3.346×10 <sup>10</sup> | 107.39  | < 0.0001 |                    |
| B <sup>2</sup> | 3.732×10 <sup>7</sup>                          | 3.732×10 <sup>7</sup>  | 0.12    | 0.7411   |                    |



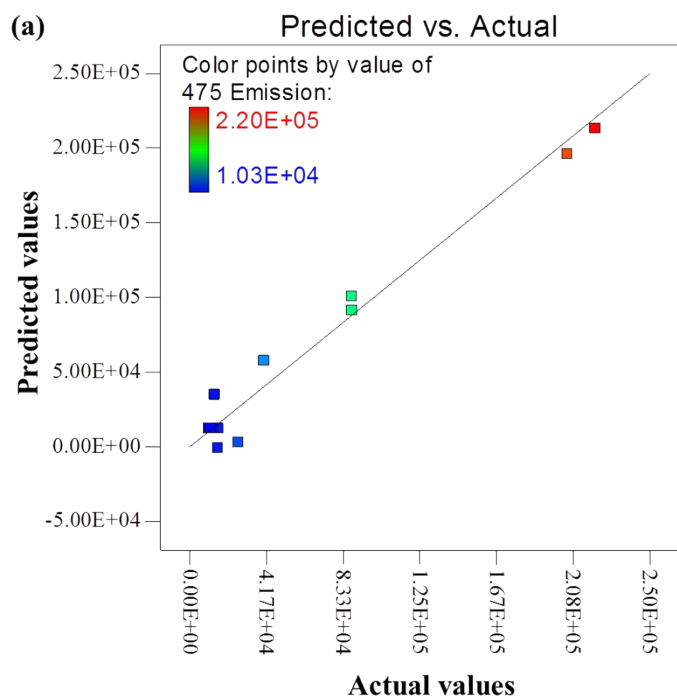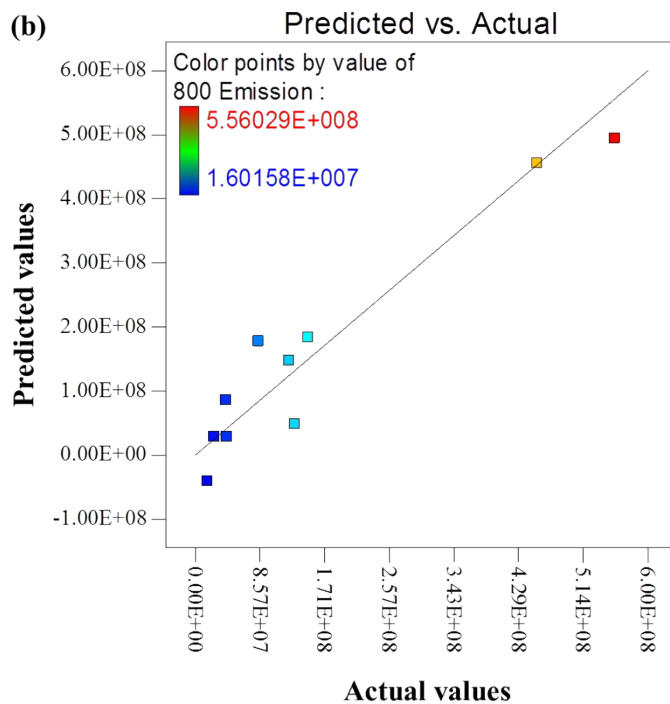

**Figure S2.** Predicted versus actual UCL emissions at (a) 475 nm and (b) 800 nm based on the chosen quadratic model.
